# Supplementary material for: RuIII(edta) complexes as molecular redox catalysts in chemical and electrochemical reduction of dioxygen and hydrogen peroxide: inner-sphere versus outer-sphere mechanism
Source: Royal Society of Chemistry journal article supplement (doi:10.1039/d1ra03293c), 2021-01-01
Supplement: d1ra03293c1.pdf [file d1ra03293c1.pdf]

## ESI

### **Ru<sup>III</sup>(edta) complexes as molecular redox catalyst in chemical and electrochemical reduction of dioxygen and hydrogen peroxide: Inner-sphere versus outer-sphere mechanism†**

Debabrata Chatterjee,\*<sup>a,b</sup> Marta Chrzanowska,<sup>b</sup> Anna Katafias,<sup>b</sup> Maria Oszajca,<sup>c</sup> and Rudi van Eldik\*<sup>b,c,d</sup>

<sup>a</sup>) Vice-Chancellor's Research Group at Zoology Department, University of Burdwan, Burdwan-713104, India, <sup>b</sup>) Faculty of Chemistry, Nicolaus Copernicus University in Toruń, Gagarina 7, 87-100 Toruń, Poland, <sup>c</sup>) Faculty of Chemistry, Jagiellonian University, Gronostajowa 2, 30-387 Kraków, Poland and <sup>d</sup>) Department of Chemistry and Pharmacy, University of Erlangen-Nuremberg, Egerlandstr. 1, 91058 Erlangen, Germany.

**S1** Freshly prepared solutions of [Ru<sup>II</sup>(edta)(pz)]<sup>2-</sup> were always used throughout all experiments. For this purpose, deaerated solutions of [Ru<sup>III</sup>(edta((pz)]<sup>-</sup> of desired concentration, were reduced by using a slight excess of ascorbic acid ([Ru<sup>III</sup>]: [ascorbic acid] = 1:5). The pH of the reacting solution was maintained at 5.0 by using NaOH/HCl solution. The whole process was carried out strictly under argon atmosphere. The same procedure was adapted for preparation of its aqua-analogue, [Ru<sup>II</sup>(edta)(H<sub>2</sub>O)]<sup>2-</sup>.

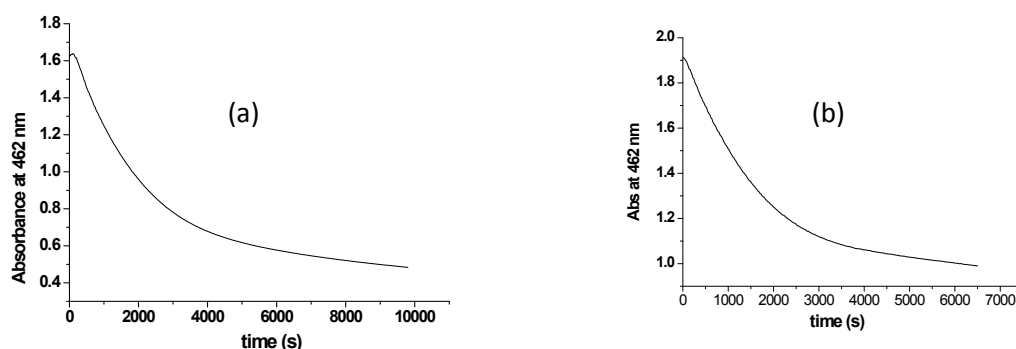

**Fig. S1** Kinetic traces recorded at 462 nm for the reaction of [Ru<sup>II</sup>(edta)(pz)]<sup>2-</sup> with O<sub>2</sub> at 25 °C and pH 5.0. [O<sub>2</sub>] = (a) 0.125 and (b) 0.25 mM. [Ru] = 0.25 mM.

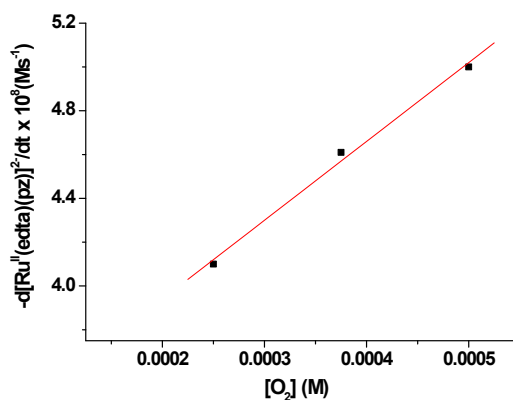

**Fig. S2** Plot of initial rate  $-d[\text{Ru}^{\text{II}}(\text{edta})(\text{pz})_2]/dt$  versus  $[\text{O}_2]$  at 25 °C and pH 5.0 (acetate buffer).  $[\text{Ru}] = 0.25 \text{ mM}$ .

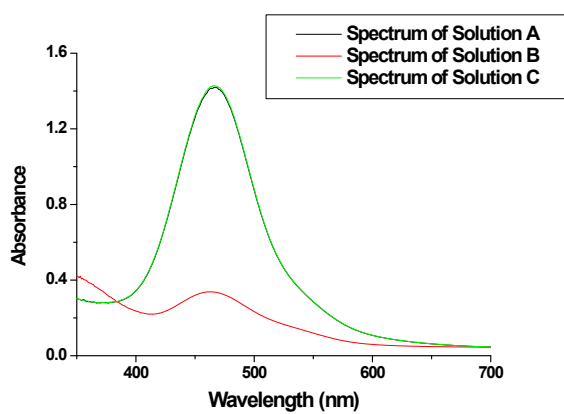

**Fig. S3** Spectra of solution A (0.2 mM deaerated solution of  $[\text{Ru}^{\text{II}}(\text{edta})(\text{pz})_2]^{2-}$ ), solution B (obtained after reaction with  $\text{O}_2$ ), and solution C (obtained after addition of fresh ascorbic acid to solution B).

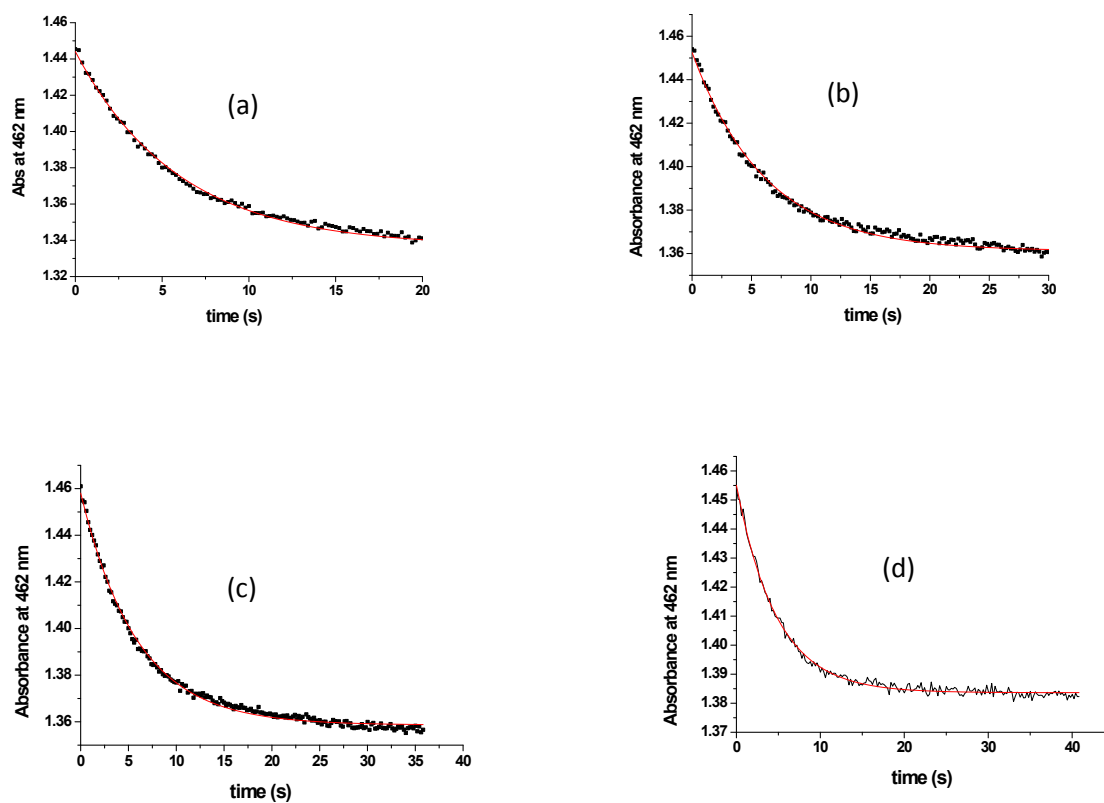

**Fig. S4** Kinetic traces (recorded at 462 nm) corresponding to the first-step (I) of the reaction of  $[\text{Ru}^{\text{II}}(\text{edta})(\text{pz})]^{2-}$  with  $\text{H}_2\text{O}_2$  at 25 °C and pH 5.0 (acetate buffer).  $[\text{Ru}] = 0.25 \text{ mM}$ ,  $[\text{H}_2\text{O}_2] =$  (a) 10 mM, (b) 20 mM, (c) 30 mM and (d) 40 mM.

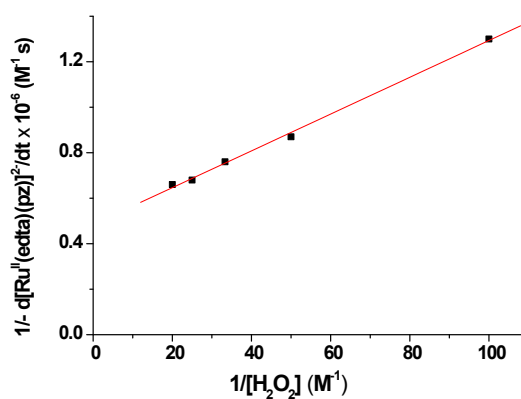

**Fig. S5** Plot of  $1/\text{rate}$  vs.  $1/[\text{H}_2\text{O}_2]$  for reaction of  $[\text{Ru}^{\text{II}}(\text{edta})(\text{pz})]^{2-}$  with  $\text{H}_2\text{O}_2$  at 25 °C and pH 5.0 (acetate buffer),  $[\text{Ru}] = 0.25 \text{ mM}$ .

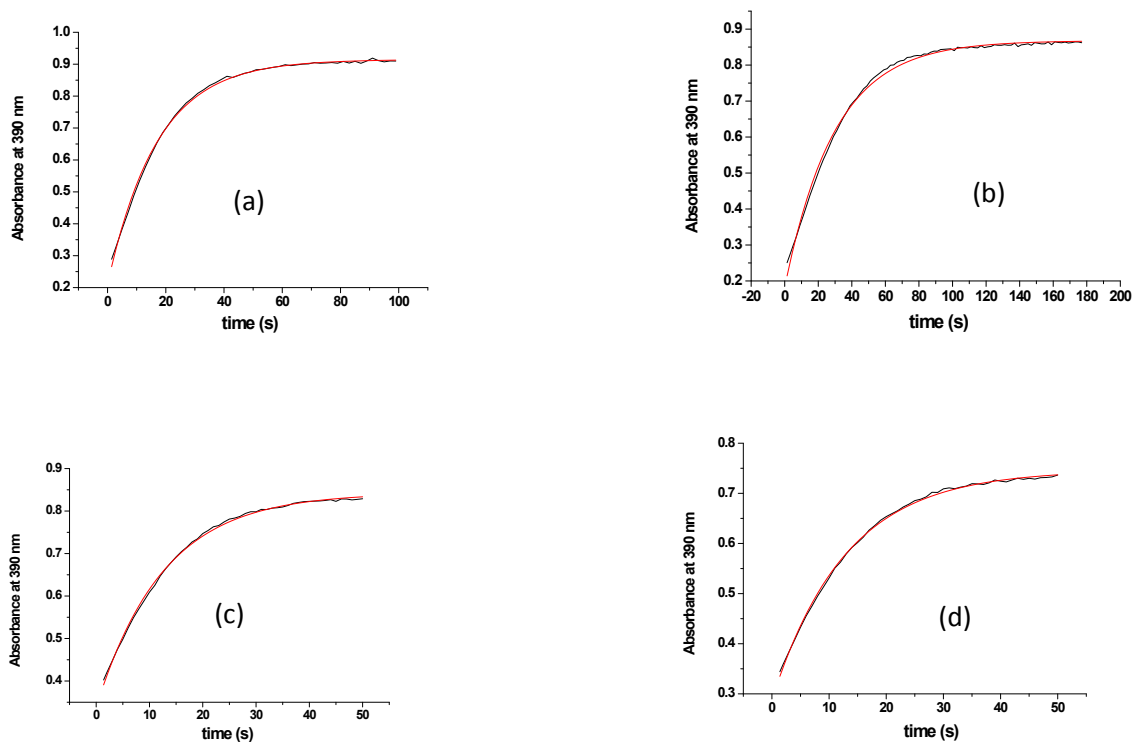

**Fig. S6** Kinetic traces recorded at 390 nm for the reaction of  $[\text{Ru}^{\text{III}}(\text{edta})(\text{pz})]^-$  with  $\text{H}_2\text{O}_2$  at 25 °C and pH 5.0 (acetate buffer).  $[\text{H}_2\text{O}_2]$  = (a) 2 mM, (b) 4 mM, (c) 6 mM and (d) 8 mM.  $[\text{Ru}] = 0.2\text{mM}$ .

**S2** Spectro-electrochemical measurements were carried out using a Potentiostat (Autolab) in parallel with the diode array spectrophotometer (Hewlett-Packard). The three electrode system was designed for a rectangular quartz cell having 1 mm internal path length. A platinum gauze as working electrode, platinum wire as auxiliary electrode and Ag/AgCl reference electrode were used for achieving constant potential electrolysis. Solution of  $[\text{Ru}^{\text{III}}(\text{edta})(\text{pz})]^-$  was prepared by mixing an equal volume of the solution of  $[\text{Ru}^{\text{III}}(\text{edta})(\text{H}_2\text{O})]^-$  (1 mM) with an equal volume of the pyrazine solution (6.5 mM) in acetate buffer (pH 5.0).

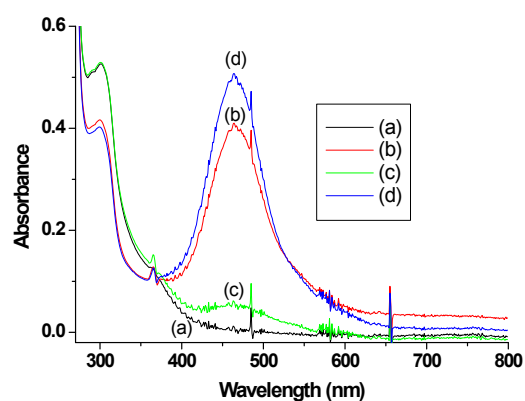

**Fig. S7** Spectra of (a) solution of [Ru<sup>III</sup>(edta)(pz)]<sup>-</sup> in acetate buffer prior to the electrolysis (Solution-1); (b) after electrolysis (1<sup>st</sup> run) of Solution-1 at -0.05 V (vs Ag/AgCl); (c) after switching off the potential followed by the oxygenation of the electrolysed solution and (d) after electrolysis (2<sup>nd</sup> run) of the deoxygenated solution (through argon purging). [Ru<sup>III</sup>] = 0.5 mM, pH 5.0.
